# Practical Fluorescence Reconstruction Microscopy for Large Samples and Low-Magnification Imaging

Julienne LaChance<sup>1</sup>, Daniel J. Cohen<sup>1,3\*</sup>

<sup>1</sup>Department of Mechanical and Aerospace Engineering, Princeton University

<sup>3</sup>Department of Chemical and Biological Engineering, Princeton University

Correspondence should be sent to:

Daniel J. Cohen

[danielcohen@princeton.edu](mailto:danielcohen@princeton.edu)

109 Hoyt Laboratory

Princeton University

Princeton, NJ 08544

## Abstract

Fluorescence reconstruction microscopy (FRM) describes a class of techniques where transmitted light images are passed into a convolutional neural network which then outputs predicted epifluorescence images. This approach enables many benefits including reduced phototoxicity, freeing up of fluorescence channels, simplified sample preparation, and the ability to re-process legacy data for new insights. However, current FRM benchmarks are abstractions that are difficult to relate to how valuable or trustworthy an FRM prediction is. Here, we relate the conventional benchmarks and demonstrations to practical and familiar cell biology analyses to demonstrate that FRM should be judged in context. We further demonstrate that it performs remarkably well even with lower-magnification microscopy data, as are often collected in high content imaging. Specifically, we present promising results for nuclei, cell-cell junctions, and fine feature reconstruction; provide data-driven experimental design guidelines; and provide the code, sample data, and user manual to enable more widespread adoption of FRM.

## Introduction

1           Deep learning holds enormous promise for biological microscopy data, and offers  
2 especially exciting opportunities for fluorescent feature reconstruction<sup>1-5</sup>. Here, fluorescence  
3 reconstruction microscopy (FRM) takes in a transmitted light image of a biological sample and  
4 outputs a series of reconstructed fluorescence images that predict what the sample would look  
5 like had it been labeled with a given series of dyes or fluorescently tagged proteins (Fig. 1A-C)  
6 <sup>2,6-10</sup>. FRM works by first training a convolutional neural network (e.g. U-Net) to relate a large set  
7 of transmitted light data to corresponding real fluorescence images (the ground truth) for given  
8 markers<sup>11-13</sup>. The network learns by comparing its fluorescence predictions to the ground truth  
9 fluorescence data and iterating until it reaches a cut off. Once trained, FRM can be performed  
10 on transmitted light data without requiring any additional fluorescence imaging. This is a  
11 powerful capability and allows FRM to: reduce phototoxicity; free up fluorescence channels for  
12 more complex markers; and enable re-processing of legacy transmitted light data to extract new  
13 information. In all cases, FRM data are directly compatible with any standard fluorescence  
14 analysis software or workflows (e.g. ImageJ plug-ins). Such capabilities are extremely useful,  
15 and FRM may eventually become a standard tool to augment quantitative biological imaging  
16 once practical concerns are addressed.

17  
18 However, a number of challenges limit FRM accessibility to the larger biological community. Key  
19 among these is the difficulty in relating the abstract accuracy metrics used to score FRM to the  
20 practical value of FRM data for actual, quotidian biological analyses such as cell counting or  
21 morphological characterization. To better appreciate this, consider first that the quality of FRM is  
22 typically assessed using a single numerical metric ( $P$ ) such as the Mean-Squared-Error or  
23 Pearson's Correlation Coefficient that typically range from (0,1) or (-1,1), and second that it is  
24 practically impossible to actually reach perfection ( $P = 1$ ).  $P$  can be increased closer to 1 either

25 by training with more images, or by using higher resolution magnification (e.g. 40X-100X) to  
26 capture finer details. However, increasing  $P$  also carries an intrinsic cost in increased wet-lab  
27 and computing time. That improving  $P$  is expensive and that  $P$  cannot be perfect beg the  
28 questions of how good is good enough, and good enough for what (Fig. 1D)? For instance,  $P =$   
29 0.7 lacks any practical context, and may be quite good enough for a given use case without  
30 requiring more work to raise the 'accuracy'. This is why context is extremely important for FRM  
31 and why the work we present here focuses on evaluating practical uses of FRM with respect to  
32 given  $P$  values.

33  
34 Our goal here is to provide a standardized implementation of FRM and demonstrate its practical  
35 performance and limitations for every-day tasks such as nuclear localization and tracking,  
36 characterizing cell morphology, cell-cell junction detection and analysis, and re-analyzing legacy  
37 data and data collected on different systems (Fig. 1). To further emphasize the use of FRM for  
38 routine tasks, we will exclusively focus on those lower magnifications (4X-20X) commonly used  
39 in high content imaging and cellular screening in contrast to the focus on higher magnifications  
40 in prior studies<sup>9,10</sup>. We hope that the included software we developed and the analyses and  
41 comparison data we present will help make FRM more approachable to the broader biological  
42 community. To further facilitate this, we have made the entirety of our code and all collected  
43 data public as well as providing a full tutorial guide (see Methods and Supplementary Material).

44

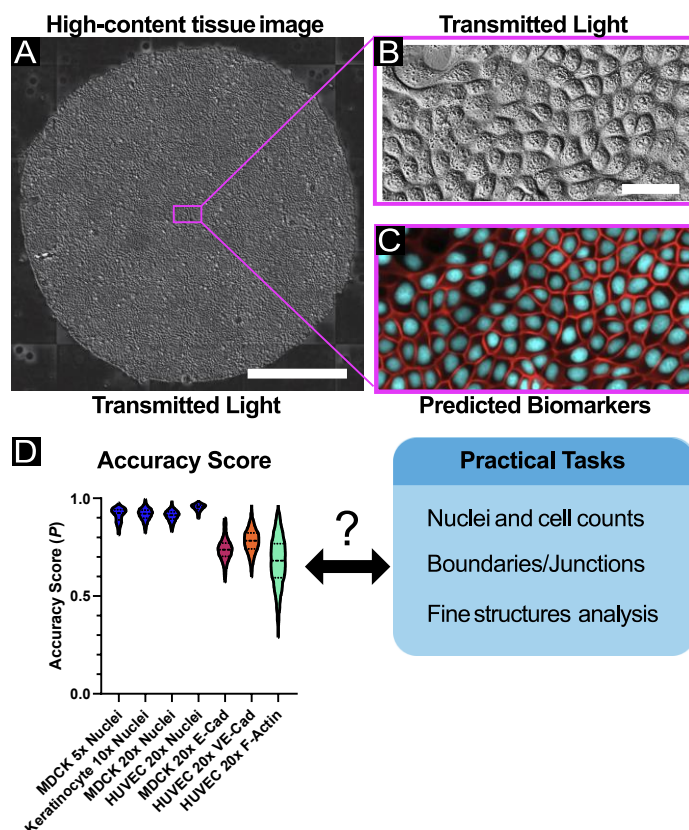

**Figure 1. High-content, high-throughput labeling of fluorescent features.**

(A) Sample large tissue of MDCK cells imaged via transmitted light (DIC). The scale bar represents 1 mm. A sub-region of the large tissue is enlarged in B. (B) A representative image which is given as input to the U-Net processing framework. The scale bar represents 50 μm. (C) The predicted fluorescent features (cell-cell junctions and nuclei) produced by the U-Net, corresponding to the same spatial region as in B. (D) Violin plot of accuracy score results from all experimental datasets.  $N > 4400$  for all datasets; see Table S1 for summary statistics. However, such accuracy metrics are not necessarily indicative of useful feature reconstructions for many practical applications.

45

46

47

**48 Adapting U-Nets for Low Magnification, High-Content FRM**

49 While early FRM methods used computationally complex and expensive networks that relied on  
50 Z-stacks of images to capture 2D reconstruction<sup>9</sup>, more recently this has been adapted to  
51 reconstruct 3D image stacks using a modified U-Net architecture<sup>10</sup>. The U-Net itself is  
52 commonly used in machine learning approaches because it is a lightweight convolutional neural  
53 network (CNN) which readily captures information at multiple spatial scales within an image,  
54 thereby preserving reconstruction accuracy while reducing the required number of training  
55 samples and training time. U-Nets, and related deep learning approaches, have found broad  
56 application to live-cell imaging tasks such as cell phenotype classification, feature  
57 segmentation<sup>10,14–19</sup>, and histological stain analysis<sup>20–23</sup>.

58  
59 Our implementation here provides an archetypal U-Net and framework intended for the cell  
60 biology community. Briefly, our workflow is as follows. First, we collected multi-channel training  
61 images of cultured cells where each image comprised a transmitted light channel and  
62 associated fluorescence channels (labeled using genetically encoded reporters or chemical  
63 dyes; see Methods). These images were then broken into 256x256 pix<sup>2</sup> sub-images in ImageJ  
64 and then input into the network. Such image chopping is necessary for the average user to  
65 account for the average RAM and graphics cards available on standard workstations. These  
66 data are then passed through the U-Net network to generate trained weights—the pattern  
67 recognition side of the network. Here, the transmitted light images serve as input to the network,  
68 which is then optimized to minimize the difference between intensity values of the output  
69 predicted images and the intensity values from the ground truth corresponding fluorescence  
70 images (e.g. Fig. 1). This process can be extended to full time-lapse video fluorescence  
71 reconstruction, making it well suited for high-content live imaging (see Movies S1-4). We have  
72 provided all of our code, all raw and processed data, and an extensive user manual  
73 (DataSpace, GitHub) to encourage exploration of FRM.

74  
75 As our conventional performance metric, we selected the Pearson's Correlation Coefficient  
76 (PCC), which is commonly used in cell biology when comparing the co-localization of two or  
77 more proteins, and also used in computer vision to assess spatial-intensity when determining  
78 image similarity. However, we observed that naively applying the PCC across our whole dataset  
79 skewed the results due to the large number of images containing primarily background  
80 (common with high content imaging of oddly shaped or low density samples). This resulted in  
81 poor PCC scores as the network tried to reconstruct the pseudo-random background noise. To  
82 address this, we report a corrected accuracy score ( $P$ ) representing the PCC of a large subset  
83 of images in a given dataset containing positive examples of the feature (nuclei, junctions, etc.)

84 based on an intensity threshold (Fig. S1, see Methods). This approach will improve network  
85 performance for datasets containing large amounts of background signal.

86 To broadly explore the utility of FRM for high-content imaging applications, we captured  
87 transmitted light images using 4X, 10X, and 20X air objectives using either Phase Contrast or  
88 Differential Interference Contrast (DIC), and collected data across 3 different cell types—renal  
89 epithelial cells (MDCK), primary mouse skin keratinocytes (KC), and human umbilical vein  
90 endothelial cells (HUVEC). Variable training set sizes were tested to also explore the effect of  
91 data set size on ‘accuracy’—a key practical aspect of designing an FRM study. The biomarkers  
92 we trained against comprised a nuclear dye (Hoechst 33342), an F-actin dye (SiR-Actin) and  
93 genetically encoded fluorescence reporters for E-cadherin and VE-cadherin. Traditional  
94 Accuracy Scores for each of these are summarized in Fig. 1D and Table S1, and we will next  
95 present case studies from each of these data sets before concluding with a discussion of how  
96 ‘accuracy’ relates to visual quality to help researchers design experiments for FRM. While we  
97 necessarily show representative data here, we provide the statistical distribution for all accuracy  
98 scores, and encourage exploration of our provided datasets.

99

100

## 101 **Results.**

### 102 ***Demonstration of FRM for low-magnification nuclear fluorescence reconstruction and*** 103 ***analysis***

104

105 One of the most common computational image processing needs for screening and low-  
106 magnification image is nuclei detection or segmentation, which enables cell counting, time-lapse  
107 tracking, and statistical analyses of ensemble distribution and geometry. While a variety of  
108 traditional image processing approaches exist to extract nuclei from phase or DIC images, such

109 techniques require extensive fine tuning, ultimately only work for certain cell types, and often fail  
110 to work at all with DIC images. The most reliable and standardized technique by far is using a  
111 vital dye (e.g. Hoechst 33342 or DRAQ) to stain the nuclei. However, Hoechst requires cytotoxic  
112 UV illumination while DRAQ (far-red fluorescence characteristics) has been linked to cell cycle  
113 alterations due to its chemistry<sup>24–26</sup>. Both dyes also exhibit loss of signal over extended time-  
114 lapse imaging. Alternately, genetic reporters such as H2B nuclear labels can be engineered into  
115 cells (e.g. transfection, viral addition, etc.), but this adds more overhead, incurs phototoxicity,  
116 and still requires a dedicated fluorescence channel for a relatively simple structure (the nucleus)  
117 in lieu of a more complex or useful label. Hence, there is a clear practical benefit to fluorescence  
118 reconstruction of cell nuclei, especially in time-lapse imaging where freeing up a channel and  
119 reducing phototoxicity are each quite valuable. Further, fluorescent reconstruction of nuclei  
120 supports any software or analysis pipeline that might normally be employed with fluorescent  
121 nuclei data, meaning that workflows need not be altered to leverage FRM data here.

122  
123 To validate low-magnification, high-accuracy nuclear FRM, we collected data in both MDCK  
124 renal epithelia cells (5X phase contrast, Figs. 2A-D) and primary skin keratinocytes (10X phase  
125 contrast, Figs. 2E-H) while using Hoechst to label nuclei and generate our ground truth training  
126 data. Representative images are presented as a sequence of phase contrast, nuclear ground  
127 truth (green), network predictions (red), and a merged overlay (yellow for a perfect merge).

128 The Accuracy Score ( $P$ ) is included for context, while the statistical distributions of  $P$  for each  
129 cell type are presented in Fig. 2I demonstrating the actual network performance. The  
130 performance with the keratinocyte data is particularly striking given how irregular and poorly  
131 resolved the cells appear in phase contrast (confounding traditional segmentation).

132  
133 The network performs visually well in both cases, with  $P \sim 0.9$ , but to represent what that means  
134 in practice, we quantified disparities in the predictions with respect to nuclear size for geometric

135 accuracy (Fig. 2J) and centroid error to reflect positional accuracy (Fig. 2K). In both nuclear  
136 area cases, the U-Net slightly overpredicts area, likely due to slight noise in the predictions  
137 blurring the predicted nuclei and effectively increasing area. However, the distributions from the  
138 violin plots are quite similar in structure, and the predictions are well within the usable range for  
139 practical cell counting and segmentation. With respect to nuclear centroid localization, mean  
140 errors span 2 microns (5X MDCK) to 1 micron (10X KCs). The improvement from 5X to 10X can  
141 likely be attributed to the resolution increase in the magnification, but in both cases the errors  
142 are quite small and more than sufficient for standard cell counting, nuclei tracking, and neighbor  
143 distribution analyses. Whether a higher  $P$  would be beneficial would depend on the specific  
144 analysis in question—here, the accuracy is more than sufficient.

145  
146 As a final demonstration of the utility of low-magnification reconstruction and nuclear tracking,  
147 we input legacy data from a 24 hr time-lapse experiment of the growth dynamics of large  
148 epithelia (2.5 mm<sup>2</sup>, 5X) and the network output a reconstructed movie of nuclear dynamics  
149 (Figs. 2L-M, and Movie S1) compatible with standard nuclear tracking algorithms (e.g.  
150 Trackmate in FIJI). Images were captured every 10 minutes, and previous efforts to perform this  
151 experiment using fluorescent imaging of Hoechst resulted in large-scale cell death, hence FRM  
152 proved highly effective both as an alternative nuclear labeling approach for large-scale, long-  
153 term imaging, and as a means to reprocess pre-existing, legacy datasets.

154

155

156

157



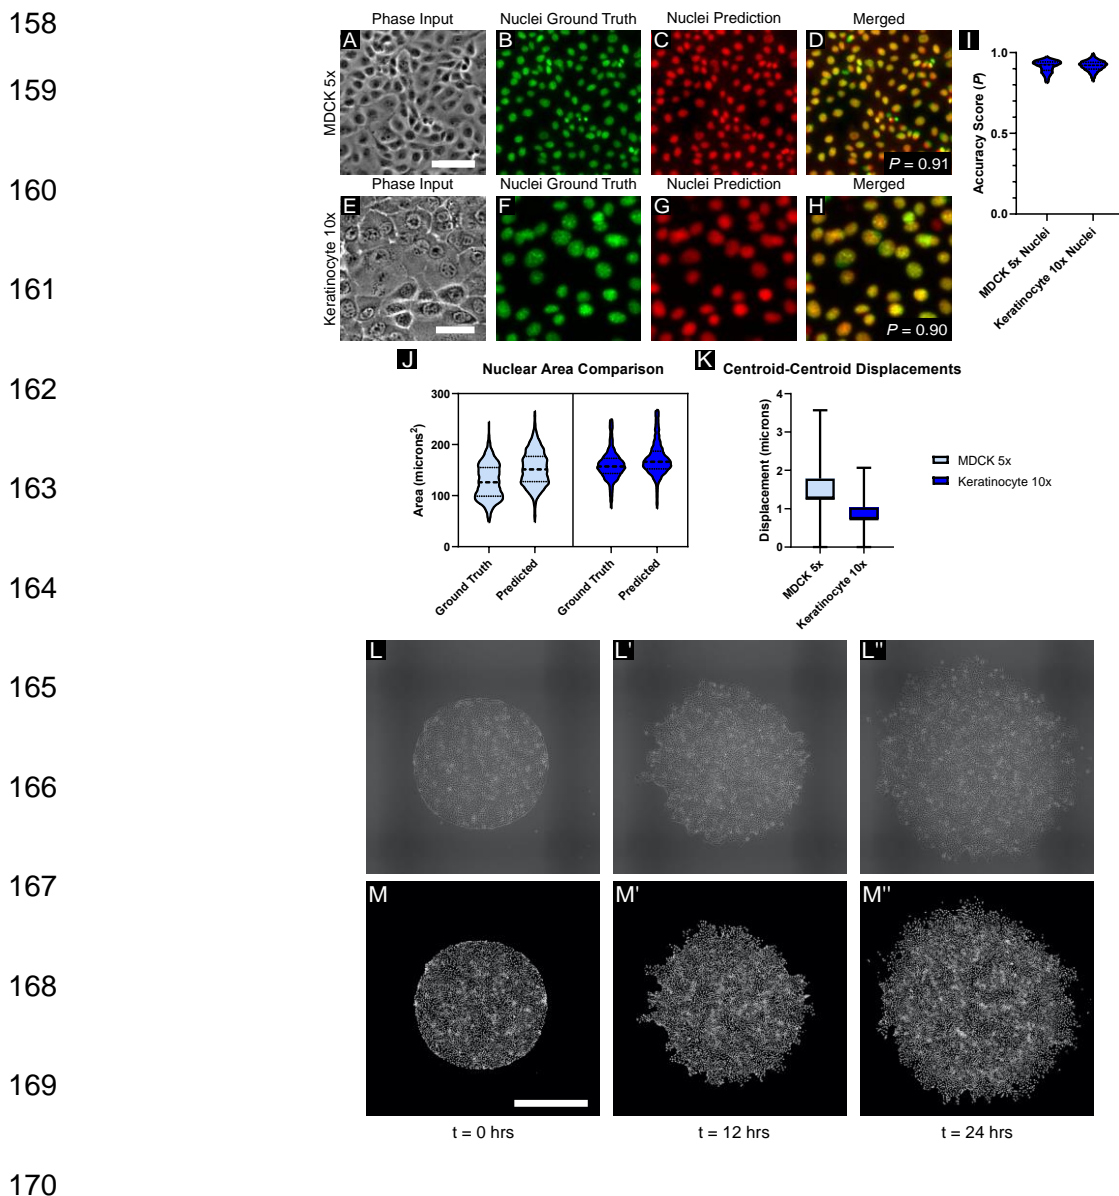

**Figure 2: Low-magnification nuclei reconstruction.**

(A) Representative transmitted-light image of MDCK cells at 5x magnification, with corresponding: (B) ground-truth nuclei, stained with Hoechst 33342 and imaged with blue fluorescent light; (C) nuclear prediction produced by the network; and (D) the overlay of (B) and (C) displayed in red and green, respectively. The raw accuracy score between (B) and (C) is given at right. The scale bar is 100  $\mu\text{m}$ .

(E) Representative transmitted-light image of keratinocyte cells at 10x magnification, with corresponding (F, G, H) ground truth nuclei image, predicted nuclei, and overlay, respectively. The accuracy score is given at right. The scale bar is 50  $\mu\text{m}$ .

(I) Comparison of the accuracy score distributions across the 5X MDCK and 10X Keratinocyte datasets,  $N > 4400$  test images for each dataset (see Table S1). (J,K) A comparison of nuclear area estimations and centroid-centroid displacement estimations, respectively, for the two low-magnification datasets considered here. The  $n$  is approximately 3500 for both plots. See *Methods*. (L-M) Sequence of phase images (L-L'') from a time-lapse at 0, 12, and 24 hours of growth, with corresponding nuclear predictions (M-M'') respectively. Input data consists of MDCK WT cells imaged at 5x magnification and montaged; the U-Net was applied in a sliding-window fashion to predict small patches of the image in parallel. The scale bar is 1 mm.

## 171 ***Reconstructing cell-cell junctions for segmentation and morphology applications***

172 Cell-cell junctions and cellular boundaries in cellular ensembles have implications spanning the  
173 epithelial-mesenchyme-transition (EMT), tissue mechanics, and tissue maturation<sup>27-29</sup> and are  
174 of broad interest from cellular biophysics to high content screening. However, there are no vital  
175 dyes for junctional proteins (e.g. E-cadherin), necessitating either antibodies or genetic  
176 reporters. In the absence of a specific marker, cell boundaries are relatively difficult to  
177 accurately segment, especially from DIC images (Fig. 3A), and proxy techniques such as  
178 Voronoi tessellation from nuclei data often fail to capture cell shape and organic features such  
179 as curved boundaries. Instead, junctions and boundary data most commonly come from  
180 biomarkers such as E-cadherin, so we trained our U-Net using MDCK cells stably expressing E-  
181 cadherin:RFP (Ecad:dsRed) and imaging with a 20X/0.75NA objective—a well-balanced  
182 objective favored for high-content imaging and immersion-free time-lapse imaging.

183 The U-Net was able to reconstruct E-cadherin junctions with high visual accuracy, as shown in  
184 the sequence from Figs. 3A-D. While  $P = 0.74$ , the reconstruction is quite spatially accurate,  
185 which is unexpected given how difficult it is for humans to detect cell-cell junctions by eye in a  
186 DIC image. To better highlight the accuracy and utility of junctional FRM, we explored how the  
187 network reconstructed a subtle 3D feature of epithelial junctions where a slanted junction is  
188 formed between two cells by one cell pushing slightly under another (the region enclosed in the  
189 dashed oval in Figs. 3B-D). Such slanted junctions may indicate a degree of fluidity or direction  
190 of migration and are also impossible to discern by eye. We quantified the accuracy of the FRM  
191 image by taking a line section perpendicular to this slanted junction (Figs. 3D,E) and comparing  
192 the profiles of the ground truth and the FRM image. In this line section, intensity values up to  
193 and including the peak value are similar, and intensity values exhibit a graded decay within the  
194 slanted junction, indicating that the FRM network is able to capture subtle 3D information from  
195 the 2D input image. To emphasize the 3D nature of this feature, a representative Z-section from

196 an E-cadherin junction imaged by scanning confocal is shown in Figs. 3F,G. FRM can again be  
197 used for high-fidelity reconstruction during a timelapse, allowing both nuclei and junctions to be  
198 predicted throughout long acquisitions (see Movie S2). Overall, our network captures junctional  
199 intensity and geometry, both of which are invisible to the eye in the DIC input image.

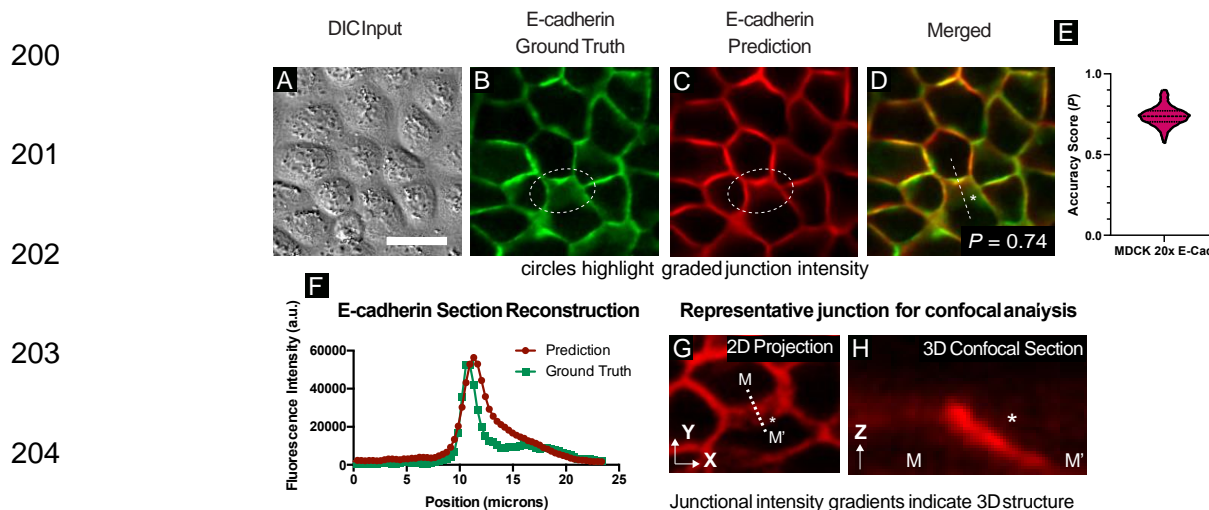

**Figure 3: Cell-cell junction reconstruction from DIC data and capturing otherwise invisible morphology**  
(A-D) Images of MDCK WT cells at 20x magnification were processed using a neural network trained to reconstruct cell-cell E-cadherin junctions. Representative ground truth features are shown alongside, and merged with, network predictions. The scale bar is 30  $\mu\text{m}$ . (E) Ensemble statistics for E-cadherin reconstruction;  $N = 4539$  test images, see Table S1. (F) Line sections from identical spatial regions in (B) and (C) highlight the accuracy of predicted fluorescence intensity across the cell-cell junctions. From 2D transmitted light input (A), 3D structures may be approximated. (G, H) Representative cell-cell junction and corresponding confocal section, highlighting the

205

### 206 ***Fine structure reconstruction***

207 In practice, high content imaging is inherently a trade-off between throughput and resolution.  
208 The more detail we can extract from lower magnification images, the more efficient the imaging  
209 and analysis. Here, we demonstrate the practical performance of FRM and a 20X/0.8NA  
210 objective to reconstruct fluorescence signatures for several useful sub-cellular markers using  
211 HUVEC cells that stably expressed VE-Cadherin:YFP (mCitrine) and were labeled with Hoechst  
212 33342 (live nuclear dye) and SiR Actin (infrared live actin dye). Processed timelapse data (see

213 Movie S3) highlights the variation of these fluorescent features given the same input (DIC)  
214 image shown in Fig. 4A.

215 As a baseline, we characterized prediction accuracy for cell nuclei as the nucleus itself is  
216 relatively low resolution, but detection of sub-nuclear features requires higher accuracy. The  
217 Fig. 4B column demonstrates FRM performance for 20X nuclei including a line section through  
218 both the bulk structure and sub-nuclear granules. Visually, the FRM image is quite accurate,  
219 and  $P = 0.91$  in this case. The line section easily captures the bulk form of the nucleus, but does  
220 not quite capture the texture inside the nucleus, although it does capture the rough form.

221 Next, we trained the network on identifying Actin after first staining HUVECs using the SiR-Actin  
222 live imaging dye. Here, the column in Fig. 4C shows significantly reduced performance as the  
223 fine F-actin filaments visible in the ground truth fail to be reconstructed in the predictions ( $P =$   
224  $0.67$ ) with the exception of some of the cortical filaments at the very edge of the cells (see the  
225 line profile). We hypothesize this is primarily due to fundamental limitations of DIC imaging and  
226 the lack of contrast for intracellular F-actin, but it may also be due to the network overprioritizing  
227 cortical filaments and the diffuse cytoplasmic signal. However, in practice we found that these  
228 FRM data were useful for general cell body detection and potential segmentation analyses due  
229 to the relatively homogeneous reconstructed fluorescence in the cytoplasmic space.

230 Finally, we trained the network with VE-Cadherin:YFP data in an attempt to reconstruct not only  
231 cellular borders, but also the well-characterized, nano-scale membrane fingers that develop in  
232 endothelial cell-cell junctions and indicate the direction of front-rear polarity in each cell <sup>30</sup>. In  
233 contrast to the actin performance, FRM proved far more capable here and readily detected both  
234 general VE-Cadherin boundaries (Fig. 4D column) and the membrane fingers (Fig. 4E column),  
235 although  $P = 0.77$  still seems quite low and likely relates to the network attempting to  
236 reconstruct the more variable granules in the center of the cell, which are irrelevant for

237 junctional analyses. While VE-Cadherin protrusions and boundaries are sometimes detectable  
238 by eye in DIC (as in Fig. 4A), they are still quite subtle in the best case, and developing a  
239 traditional computer vision process to detect and extract them has not been demonstrated,  
240 thereby again highlighting the practical value of FRM to reconstruct not only fluorescence, but  
241 also key morphological markers that are much easier to analyze in the FRM image than in the  
242 DIC image. The statistical accuracy distributions are shown in Fig. 4F, where the spread of the  
243 data in F-actin indicates the lack of reliability, while the tighter distributions for nuclei and VE-  
244 cadherin indicate more useful reconstructions. Again, the value of FRM depends on the specific  
245 question and context, and the decision of whether it is 'good enough' at detecting fine structures  
246 rests with the end user. For reference, short movies of several markers are presented in Movies  
247 S3-5. Additionally, training the network with large and varied datasets enable it to begin to  
248 predict statistically rarer events, such as mitotic divisions, as shown in Movie S6.

249

250

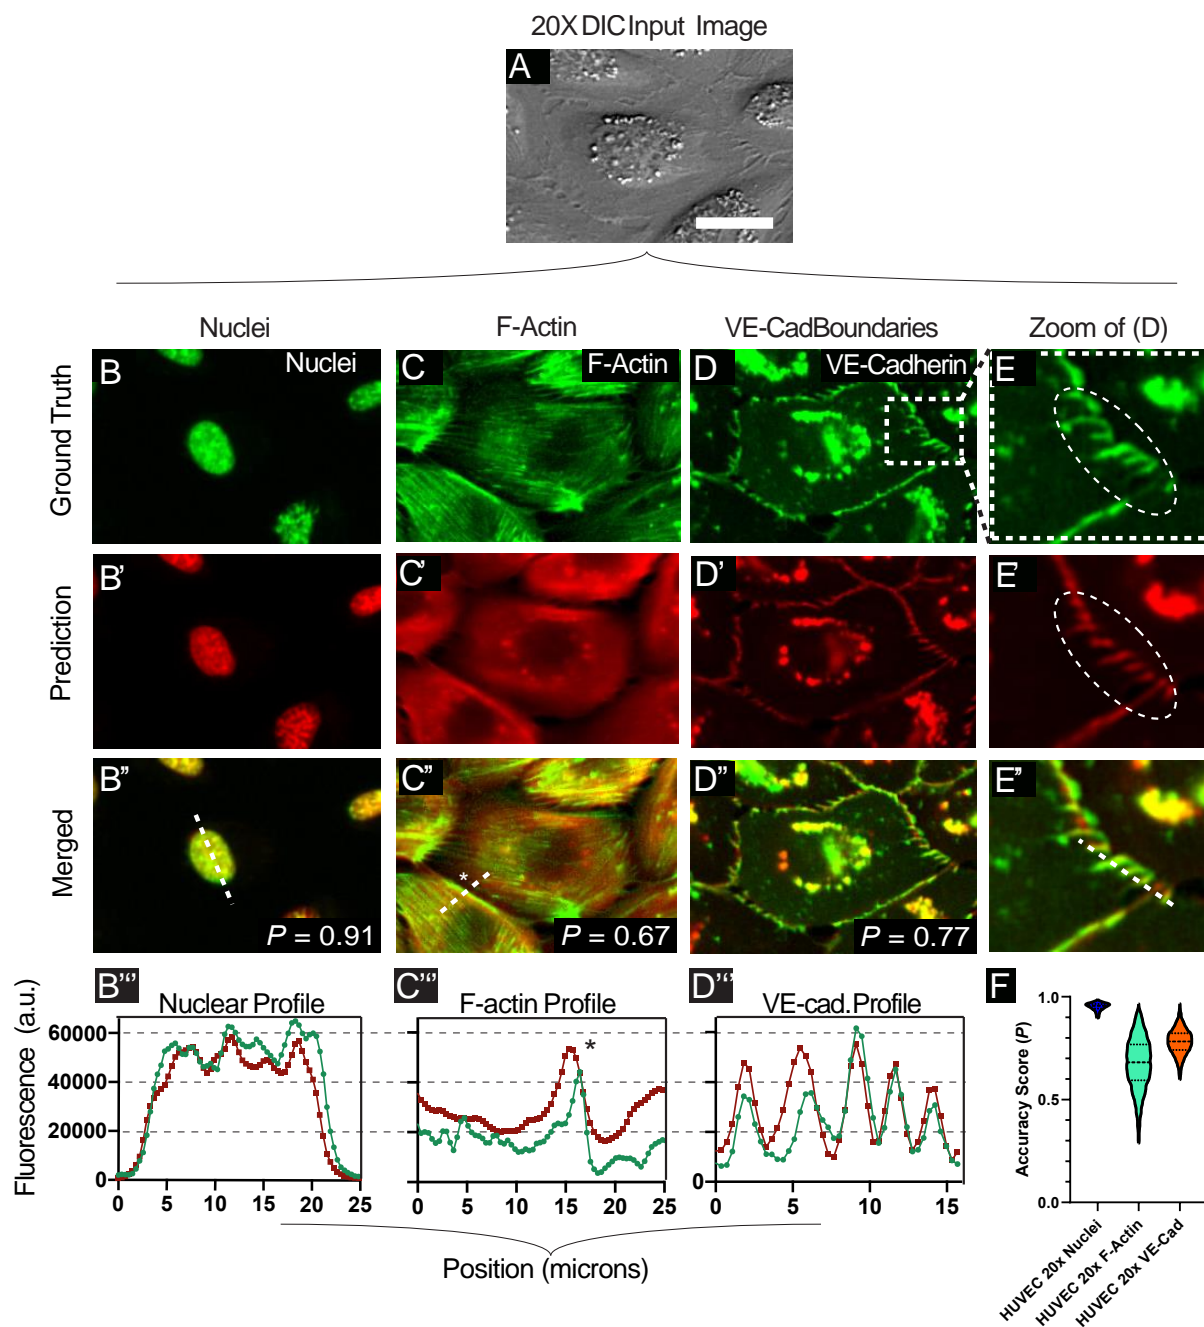

**Figure 4: Coarse-to-fine feature reconstruction.**

(A) A representative transmitted-light image of HUVEC cells at 20x magnification with its corresponding structures of varying scale (B-D). The scale bar represents 30  $\mu\text{m}$ . (B-D) the relatively large nuclei, the finer VE-Cadherin structures, and thin F-Actin filaments which are not readily resolved by the network. Ground truth fluorescent features are displayed alongside, and merged with, network predictions. (E) displays zoomed-in portions of images shown in (D). Line sections from (B'', C'', and D'') are displayed graphically in (B''', C''', D'''), to enable intensity comparisons across the ground truth and predicted features. (F) summarizes the distribution statistics, clearly showing the uncertainty in F-actin, with tighter reconstruction for nuclei and VE-cadherin.  $N = 5500+$  test images for these datasets.

## 252 **Comparing FRM visual performance to $P$ scores, training set size, and network**

253 A key feature of FRM is that its performance can often be increased by collecting more training  
254 data, which in turn ought to improve  $P$ . However,  $P$  will never be perfect, nor is  $P$  necessarily  
255 the best metric to go by when determining if an FRM image is ‘good enough’, as clearly the  
256 context matters and the key question is ‘good enough for what?’ Hence, we sought to provide  
257 several examples of how the size of the training set affects both  $P$  and the actual visual  
258 accuracy or quality of the resulting FRM predictions.

259 To do this, we first swept through different sizes of training sets for many of the biomarkers  
260 presented earlier (see *Methods*). Briefly, we selected random subsets of very large datasets and  
261 trained the U-Net from scratch with these subsets. This process was repeated for different  
262 fractions of the complete dataset to capture the FRM performance versus training set size. The  
263 relation between  $P$  and training set size is shown in Fig. 5A to give a sense of how the  
264 quantitative accuracy progresses and eventually plateaus. In contrast, we also provide FRM  
265 results from the fractional training sets for the 20X HUVEC and MDCK data (Figs. 5B,C;  
266 respectively). Here, the input and ground truth data are presented alongside representative  
267 FRM predictions from networks trained with different numbers of training images (noted below  
268 each image). As a single image from the camera (2048x2048 pixels) is first split into 256x256  
269 pixel sub-images for training, a fractional image (e.g. Fig. 5C, 1/16<sup>th</sup> column) implies that the  
270 network was trained on just a small crop from a single micrograph. Broadly speaking, and as  
271 expected, these data all indicate that FRM quality varies directly with the size of the training set,  
272 as expected.

273 However, Fig. 5A demonstrates that the rate of change in quantitative quality ( $P$ ) vs. training set  
274 size is neither linear nor is it uniform across different biomarkers. Further, the actual predicted  
275 images shown in Figs. 5B,C offer further nuance because they demonstrate that training the

276 network against even a single image would be sufficient to capture nuclei for the purposes of  
277 tracking or segmentation, while just 6 images would be sufficient to capture cell shape and  
278 junctional geometry in epithelia assuming the researcher were willing to perform some simple  
279 manipulations such as background subtraction. There is an obvious performance increase for  
280 both cadherins when the training set comprises several hundred images, but it is difficult to  
281 visually detect a difference between nuclei reconstructed from 6 or 400 images.

282 An alternate way to improve FRM would be to alter the U-Net architecture. Here, we first  
283 compared the standard U-Net to a neural network architecture which was essentially two U-Nets  
284 stacked end-to-end with additional residual connections. Such an approach has been shown to  
285 improve network depth and performance in other applications<sup>31–33</sup>. Here, however, we observed  
286 no benefit to training a deeper network (see Fig. S2). Further, given the significant temporal and  
287 computational cost, we advise against its use for this kind of FRM. Alternately, we explored the  
288 role of the loss function, testing our Pearson's-based loss function against the traditional Mean-  
289 Squared-Error loss function and found no significant difference (Fig. S3; Methods). Hence, we  
290 conclude that our minimal U-Net implementation performs well as a foundation for a variety of  
291 daily analysis tasks without requiring significant fine tuning.

292

293

294



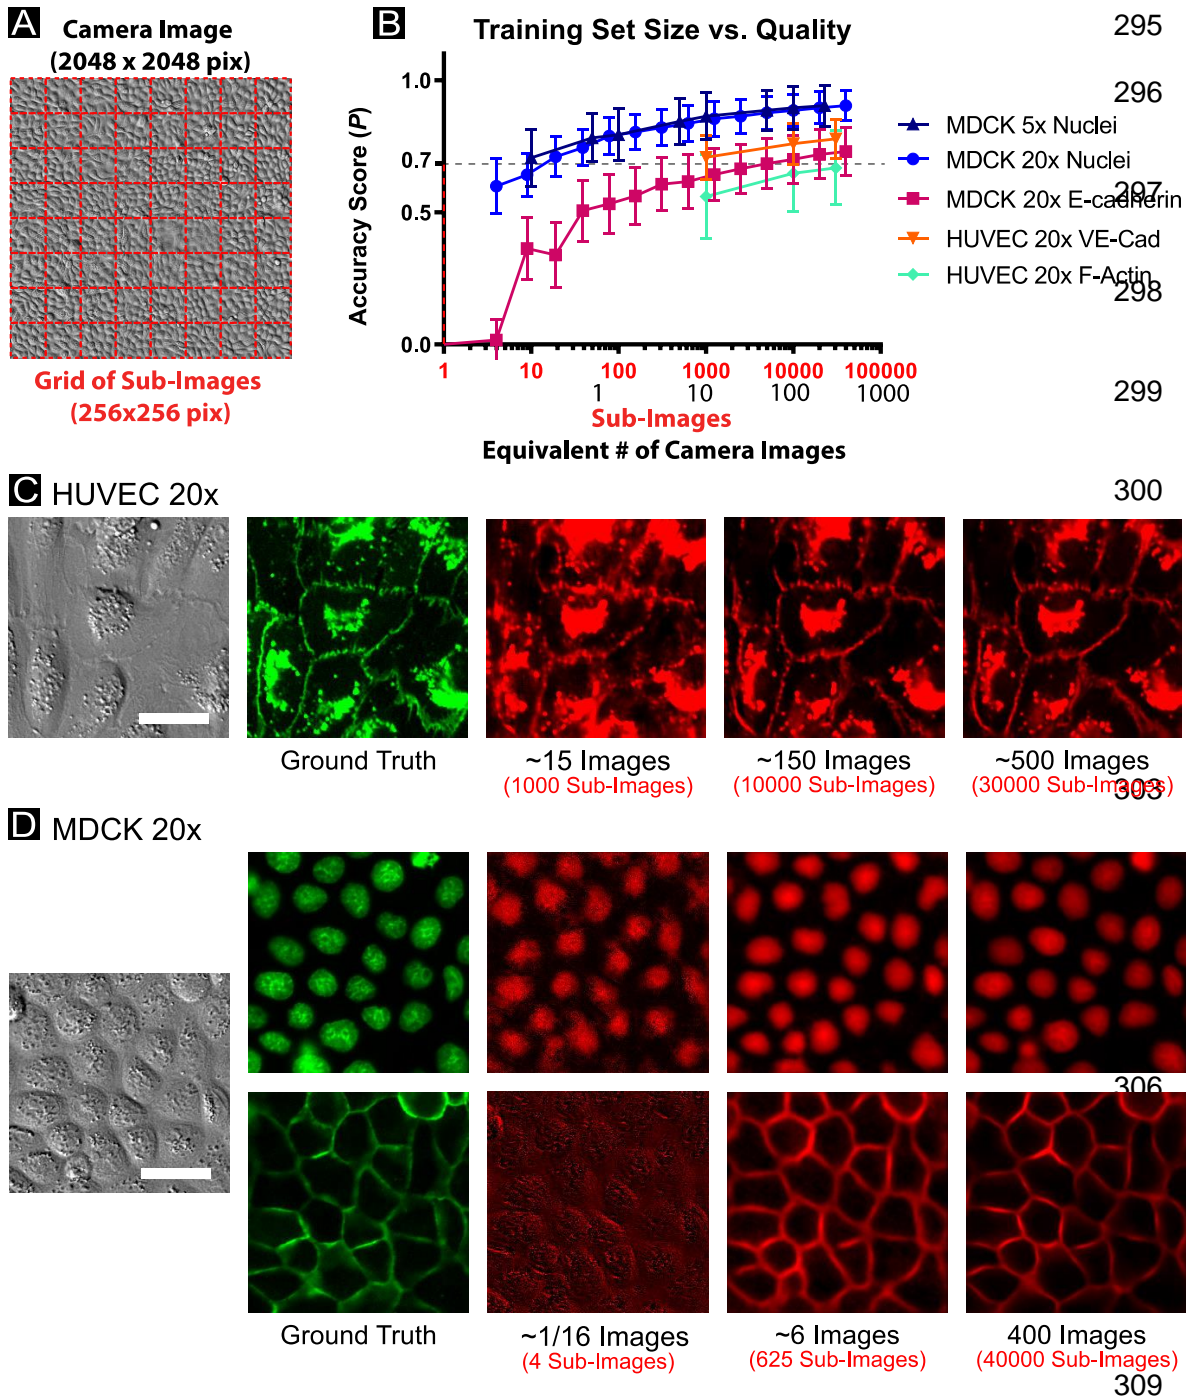

310

**Figure 5: Impacts on prediction accuracy from smaller training sets.**

(A) Cropping a sample image into 64 sub-images. (B) A comparison of network prediction accuracy as a function of training set size. The U-Net is trained with the complete dataset as described in Table S1 for each experimental condition. Then, random images representing a fraction of the total training set is used to train a new U-Net from scratch. (C, D) display representative images for the HUVEC 20x dataset and the MDCK 20x dataset, respectively, with predictions shown for various training set sizes. This type of analysis may assist users in collecting enough data for their task-specific quality requirements. All scale bars represent 30  $\mu$ m.

## 311 Discussion

312

### 313 ***Limitations of existing accuracy metrics and the importance of context***

314 Our data—collected from actual, real-world analyses, highlight the limitations of using traditional  
315 accuracy metrics from computer vision for biological image analysis. Specifically, while there is  
316 a general relation between an improved  $P$  Accuracy Score and FRM quality, it is not linear nor  
317 intuitive how to determine what is ‘good enough’ given only a  $P$  value devoid of context for a  
318 specific analysis. Further, and most critically, FRM does not reconstruct images according to  
319 human imperatives. The U-Net only optimizes via the specific loss function it has been given  
320 (e.g. Mean-Squared-Error or the Pearson’s coefficient). What the computer considers ‘good’  
321 need not match our own assessments of value and quality.

322

323 As a practical example, compare the FRM performance for E-cadherin ( $P = 0.73$ ; Fig. 3) and F-  
324 actin ( $P = 0.67$ ; Fig. 5). While the accuracy metrics differ by  $< 10\%$ , the FRM of F-actin only  
325 detected peripheral actin cables, otherwise blurring all internal features into a homogeneous  
326 signal. Nonetheless, even this plainly ‘inaccurate’ signal could prove useful for cytoplasmic  
327 reconstruction and tracking. In stark contrast, the E-cadherin data was much more visually  
328 accurate and also captured key quantitative features of the ground truth such as junctional  
329 localization and intensity, and even the subtle intensity gradients representing 3D morphology  
330 despite having only a slight improvement in  $P$ -values. Yet despite that, a score of 0.73 is far  
331 enough from ‘1’ that it is ambiguous in absence of a specific analysis, which is why FRM must  
332 be evaluated in the context of a given question or analysis.

333

### 334 ***Practical considerations for training on new, low-magnification data***

335 We specifically targeted the lower-magnification end of the imaging spectrum to explore how  
336 well FRM performed at magnifications more commonly used for high content imaging

337 applications such as timelapse studies of very large cellular colonies or massive screens using  
338 multiwell plates. Our data indicate that such magnifications can be effectively combined with  
339 FRM for applications spanning nuclear tracking, cell-cell junction analysis, and certain fine-  
340 structure reconstruction even at just 20X.

341

342 A particular concern for the average user of a complex machine learning process is the size of  
343 the dataset required as this can impose potentially strenuous experimental demands. However,  
344 our characterization of FRM performance vs. data set size again shows the importance of  
345 context as relatively few images are needed to get quite accurate nuclei reconstruction, while a  
346 greater number of images are needed for junction reconstruction (Fig. 6). However, we also  
347 note that our largest training set size comprised at most 500 camera images at 20X  
348 (approximately one six-well plate)—something easily obtained with a standard automated  
349 microscope, and still compatible with manual capture. Further, a very common approach in  
350 machine learning is to ‘augment’ an image dataset by performing reflections and rotations on  
351 images such that the network perceives each augmented image as a different datapoint,  
352 thereby virtually increasing the size of the dataset. We did not perform such augmentation here  
353 for the sake of simplicity and transparency, which suggests that significantly smaller datasets, if  
354 augmented, could still produce good results.

355

### 356 ***FRM versus machine-learning segmentation approaches***

357 FRM is a quickly developing technology that exists alongside another popular approach where  
358 machine learning is used for feature segmentation<sup>14,19,34</sup>. In the latter case, the network is  
359 trained to specifically detect ‘features’ (e.g. nuclei) as binary objects, whereas FRM instead  
360 reconstructs the effective fluorescent image of what a fluorescent label against that structure  
361 might show. Both are useful techniques, and the best approach depends on the application.  
362 However, there are several unique advantages to FRM. First, reconstructing an effective

363 fluorescent image from auto-annotated data (e.g. chemical dyes, antibodies, fluorescent  
364 proteins) obviates the need for any manual annotation or pre-processing—often quite time  
365 consuming and subjective. This means that an FRM image can be directly incorporated into any  
366 existing analysis pipeline intended for fluorescent images, including traditional threshold-based  
367 segmentation approaches. Further, more of the original data is preserved in an FRM image,  
368 allowing the capture of things such as fluorescence intensity gradients (e.g. Fig. 3), and features  
369 that might be lost during traditional binary segmentation.

370

### 371 ***Concluding remarks***

372 Here, we characterize the value of fluorescence reconstruction microscopy (FRM) for everyday  
373 analysis tasks facing researchers working with cell biology. We specifically highlight the need for  
374 individual researchers to explore and evaluate FRM in the context of specific research questions  
375 rather than accuracy metrics. We also highlight the surprisingly good performance of FRM even  
376 with lower magnification imaging or relatively fine structures such as VE-cadherin fingers.  
377 Finally, we have made all of our tools and all training datasets publicly available to improve  
378 accessibility and provide a starting point for researchers new to FRM to easily explore it for  
379 themselves and to eventually build on and improve.

## 380 **Methods.**

### 381 ***Tissue culture***

382 MDCK-II (G-type) cells stably expressing E-cadherin:dsRed were cultured in low glucose  
383 DMEM. The MDCK-II culture media was supplemented with 10% Fetal Bovine Serum (Atlanta  
384 Biological) and penicillin/streptomycin. HUVEC endothelial cells stably expressing VE-  
385 cadherin:mCitrine were cultured using the Lonza endothelial bullet kit with EGM2 media  
386 according to the kit instructions. Primary murine keratinocytes were isolated from neonatal mice  
387 (courtesy of the Devenport Laboratory, Princeton University) and cultured in custom media<sup>35</sup>. All  
388 cell types in culture were maintained at 37°C and 5% CO<sub>2</sub> in air.

### 389 ***Preparation of training samples***

390 We collected training data using 3.5-cm glass-bottomed dishes coated with an appropriate  
391 ECM. To coat with ECM, we incubated dishes with 50 µg/mL in PBS of either collagen-IV  
392 (MDCK) or fibronectin (HUVEC, primary keratinocytes) for 30 min 37 °C before washing 3 times  
393 with DI water and air drying the dishes.

394 In order to contain a variety of conditions within a single plate to ensure a broad training sample,  
395 we placed silicone microwells into the dishes as described in [<sup>36</sup>] at densities from [1-2x10<sup>6</sup>  
396 cells/mL] which ultimately allowed for single cells, low density confluent monolayers, and high  
397 density confluent monolayers to be captured. Silicone microwells consisted of 3x3 arrays of 9  
398 mm<sup>2</sup> microwells into which we added 4 µL of suspended cells in media, allowed them to adhere  
399 for 30 min in the incubator (6 hrs for keratinocytes), added media and returned them to the  
400 incubator overnight prior to imaging. To further ensure variability, several dishes were also  
401 randomly seeded with cells for each cell type.

### 402 ***Fluorescent labeling for ground truth data***

403 We used the live nuclear dye NucBlue (ThermoFisher; a Hoechst 33342 derivative) with a 1 hr  
404 incubation for all nuclear labeling. We used SiR-Actin (Spirochrome) at 10 µM for live F-actin  
405 labeling in HUVECs. All other labels were genetically encoded reporters as described.

### 406 ***Image Acquisition***

407 5X MDCK data was collected on a Zeiss (Observer Z1) inverted fluorescence microscope using  
408 a 5X/0.16 phase-contrast objective, an sCMOS camera (Photometrics Prime) and controlled  
409 using Slidebook (Intelligent Imaging Innovations, 3i). An automated XY stage, a DAPI filter set,  
410 and a metal halide lamp (xCite 120, EXFO) allowed for multipoint phase contrast and  
411 fluorescent imaging.

412 All epifluorescence imaging was performed using a Nikon Ti2 automated microscope equipped  
413 with a 10X/0.3 phase objective, a 20X/0.75 DIC objective, and a Qi2 sCMOS camera (Nikon  
414 Instruments). Time-lapse imaging effectively increased dataset size as long as sufficient time  
415 was allowed between frames to avoid overfitting in the U-Net. MDCK data was collected at 20  
416 min/frame, while HUVEC and keratinocytes were given 60 min/frame. Standard DAPI, CY5, and  
417 YFP filters sets were used. Confocal sections of E-cadherin fluorescence in MDCK cells (Fig. 3)  
418 were collected using a Leica SP8 scanning confocal tuned for dsRed excitation/emission.

419 All imaging was performed at 37 °C with 5% CO<sub>2</sub> and humidity control. Exposures varied, but  
420 were tuned to balance histogram performance with phototoxic risk. Data with any visible sign of  
421 phototoxicity (blebbing, apoptosis, abnormal dynamics) were excluded entirely from training.

## 422 **Data Pre-Processing and Training**

423 Prior to input to the network, raw images were segmented into 256x256 pixel<sup>2</sup> sub-images,  
424 ensuring consistent slicing across the transmitted-light image and the corresponding fluorescent  
425 image. The images were then normalized by statistics collected across all images in each  
426 channel: that is, by subtracting from each image the mean and dividing by the standard  
427 deviation. A test-train split was applied, such that a random 20% of the total images were held  
428 out to comprise the test set. Additionally, 10% of the training data subset were held out for  
429 validation as is standard.

430 The U-Net style architecture shown in Figure 1 was trained using TensorFlow<sup>37</sup> and the  
431 ADADELTA optimizer<sup>38</sup>. In the standard training experiments, the mean squared error (MSE)  
432 loss function was applied across pixel intensity values in the predicted images compared to  
433 intensity values in the ground truth images. Results from the MSE were contrasted with results  
434 from two networks trained to maximize the Pearson's correlation coefficient (PCC). The PCC is  
435 commonly used in cell biology for evaluating the colocalization of two fluorescently labeled  
436 structures<sup>39</sup>. The PCC loss function was defined, for two intensity data sets  $R$  and  $G$ , as:

$$437 \quad PCC = \frac{\sum_i (R_i - \bar{R}) \times (G_i - \bar{G})}{\sqrt{\sum_i (R_i - \bar{R})^2 \times \sum_i (G_i - \bar{G})^2}}$$

$$438 \quad Loss = \frac{(1 - PCC)}{2}$$

439 Sample training loss plots are provided (Fig. S4), reflecting the use of early stopping during  
440 training. That is, when the validation loss did not decrease for 75 epochs, the training process  
441 terminated. The training and test set sizes and results are provided for all experimental  
442 conditions in Table S1.

443 For several of the experimental conditions, networks were trained using subsets of the  
444 original dataset. To do so, the network architecture was fixed, and networks were trained from  
445 scratch by using a random subset of matched input-output image pairs from the original training  
446 set. The training setup, including hyperparameters, was unmodified regardless of training set  
447 size. The original test set was used to compare results for all training set size tests relative to  
448 each experimental condition.

## 449 **Data Testing and Image Processing**

450 The Pearson's correlation coefficient (PCC) of each test set is determined by individually  
451 computing the PCC between each predicted image, as output by the network, and its  
452 corresponding ground truth image. Additionally, an accuracy score ( $P$ ) based on the PCC was  
453 devised to more reliably represent the performance of the network. To determine  $P$ , we report  
454 the PCC on a subset of the test set which selects for only those test images containing positive  
455 examples of features (nuclei, junctions, etc.). We construct this subset by manually determining  
456 threshold values to distinguish image intensities indicating the presence of the relevant features  
457 versus background noise for each test set. That is, the histograms of a subset of the data  
458 containing positive examples of features are plotted, and an approximate lower bound on

459 intensity values is estimated to distinguish the features from the background. Then, the  
460 histograms of a subset of the data containing only background are plotted to ensure that the  
461 threshold value is adequate to label the images as background-only images. The MatLab  
462 function `rmoutliers()` was utilized to remove outliers when  $P$  is reported for each condition.

463 For the low-magnification experimental conditions, a nuclear area comparison was  
464 performed between corresponding ground-truth and predicted images. Initially, both pairs of  
465 output nuclear images were segmented independently using standard auto-thresholding,  
466 watershedding, and size exclusion (to exclude clusters) in ImageJ/FIJI, and then outliers were  
467 removed using the MatLab function `rmoutliers()`. We additionally report the centroid-centroid  
468 displacement values for the same segmented images. The ImageJ/FIJI plugin TrackMate was  
469 used to determine displacements between the ground truth and predicted images, as if they  
470 were two frames of a video. Standard TrackMate settings were used and outliers were removed  
471 using the MatLab function `rmoutliers()` for reporting.

472 When intensity plots for line slices are reported, a line is selected as an ROI in  
473 ImageJ/FIJI, and intensity values are exported for analysis.

474 New large transmitted-light images were processed using a sliding-window technique.  
475 We processed a large image by analyzing  $256 \times 256$  pixel<sup>2</sup> patches of the input image with a  
476 stride of 64 pixels in each direction. Additionally, the border of each predicted patch was  
477 excluded in the sliding-window process, as features near the patch borders are likely to have  
478 lower accuracy (often as a function of cells being cut off). The sliding-window predictions at  
479 each pixel were then averaged to produce the final large predicted image. Timelapse movies  
480 can be processed on a frame-by-frame basis. If scaling was required as described in Fig. 3, the  
481 input was scaled in FIJI and then passed to the network for analysis.

## 482 ***Code and Dataset Availability***

483 All code used for pre-processing data, training the network, testing a trained model, and  
484 applying the model to new images, along with an extensive user manual and pre-trained weight  
485 files can be found at:

486 <https://github.com/CohenLabPrinceton/Fluorescence-Reconstruction> .

487 Additionally, our complete testing datasets, along with corresponding reconstructed images, are  
488 available through our Zenodo repository, which can be found at:

489 <http://doi.org/10.5281/zenodo.3783678> .

## 490 **Acknowledgements**

491 Special thanks to Gawoon Shim for assistance with HUVEC and keratinocyte data collection.

492

493 **Supplementary Materials**

494

| Magnification | Cell type    | Feature     | Training Set Size (sub-images) | Test Set Size | Modified P: Reduced Test Set Size | PCC Mean | PCC St.Dev | Modified P Mean | Modified P St.Dev |
|---------------|--------------|-------------|--------------------------------|---------------|-----------------------------------|----------|------------|-----------------|-------------------|
| 5x            | MDCK         | Nuclei      | 22835                          | 5709          | 4443                              | 0.72529  | 0.35884    | 0.90322         | 0.07801           |
| 10x           | Keratinocyte | Nuclei      | 26214                          | 6554          | 4156                              | 0.57717  | 0.43833    | 0.9014          | 0.093155          |
| 20x           | MDCK         | Nuclei      | 40000                          | 10000         | 4556                              | 0.43844  | 0.43333    | 0.90327         | 0.05724           |
| 20X           |              | E-cadherin  | 40000                          | 10000         | 4539                              | 0.37466  | 0.34172    | 0.73053         | 0.091688          |
| 20X           | HUVEC        | Nuclei      | 30720                          | 7680          | 5533                              | 0.68936  | 0.40728    | 0.93776         | 0.060886          |
| 20X           |              | VE-cadherin | 30720                          | 7680          | 5666                              | 0.60824  | 0.30398    | 0.77737         | 0.074176          |
| 20X           |              | F-actin     | 30720                          | 7680          | 5820                              | 0.51247  | 0.30438    | 0.66808         | 0.14057           |

495

496 **Table S1. Accuracy and training statistics for all experimental conditions.**

497

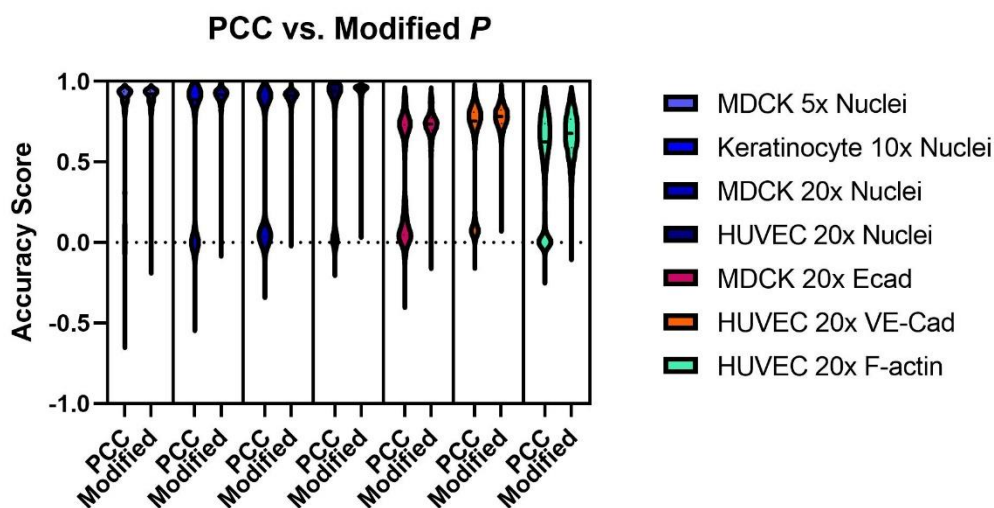

498

499 **Figure S1.** A comparison of experimental results in Pearson's Correlation Coefficient (PCC),  
 500 versus a modified accuracy score  $P$  (see *Methods*). To ensure a fairer comparison, outliers  
 501 were not removed; only intensity thresholding was performed to produce the modified  $P$  from  
 502 the PCC. By filtering the PCC results by an intensity threshold in the fluorescent images, we  
 503 remove low-scoring background images, which bias our accuracy score on the complete  
 504 dataset. Visual inspection of the plot reveals the low-scoring images as "bumps" near 0.0.

505

506

507

508



509  
510

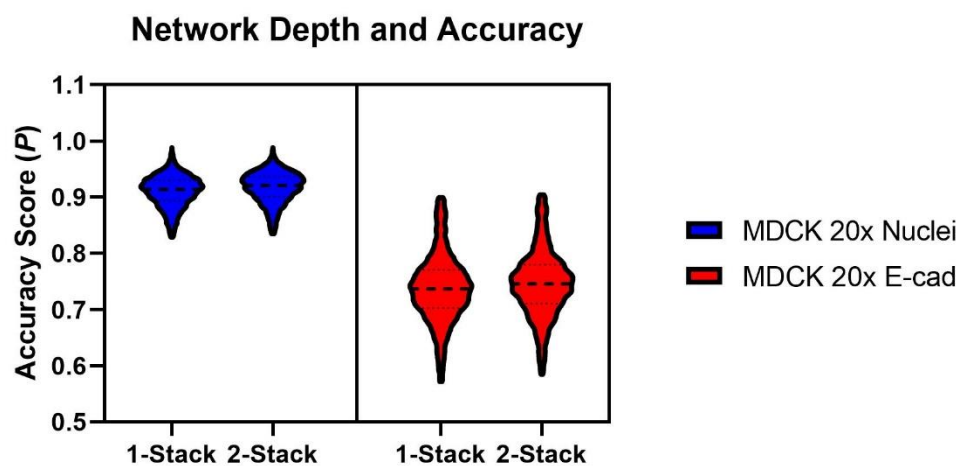

511

512 **Figure S2.** Representative accuracy results for a dataset trained on the standard (1-stack) U-  
513 Net, compared to a network comprised of two U-Nets stacked back-to-back, with residual  
514 connections (2-stack). Training conditions were otherwise unchanged. Accuracy scores, as  
515 reported in terms of the modified  $P$  (see *Methods*) were comparable.

516

517

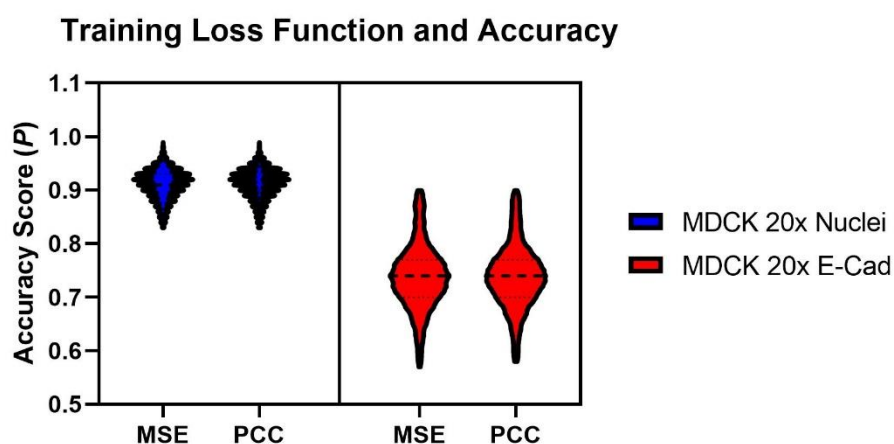

518

519 **Figure S3.** Representative accuracy results for networks trained using the Mean-Squared Error  
520 loss function (MSE) compared to the Pearson's Correlation Coefficient loss function (PCC). The  
521 neural network architecture and training conditions are the same, with the exception of the  
522 choice of loss function. Accuracy scores, as reported in terms of the modified  $P$  (see *Methods*)  
523 were comparable.

524

525

526

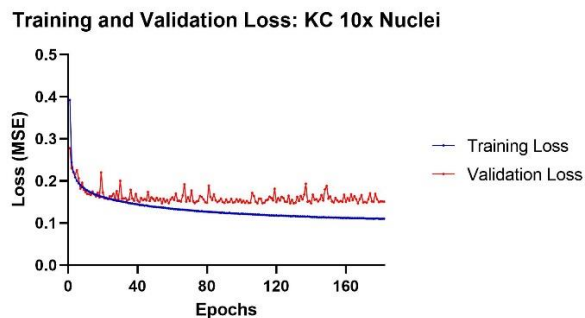

527

528

529 **Figure S4.** Representative loss functions from the standard U-Net training process. Early  
530 stopping was enabled, so that if the validation loss did not decrease within a set number of  
531 epochs, the training process terminated.

532

533

534

535

536

537

538

**Movie captions on the following page**

539

540

541

542

543

544

545

546

547 **Supplementary Movie Captions:**

548 **Movie S1. Fluorescence reconstruction microscopy (FRM) on timelapse data.**

549 A phase-contrast timelapse of MDCK cells, imaged at 5x magnification, is shown at left. The  
550 center panel displays nuclear predictions produced by the trained U-Net, given individual frames  
551 from the phase-contrast timelapse as input. The overlay of the phase-contrast movie and the  
552 nuclear predictions is shown at right. Each panel is 0.31 cm x 0.31 cm, and time between  
553 frames is 20 minutes. Video compressed for supplement, but raw data available on request.

554 **Movie S2. FRM for high-content screening.**

555 A DIC timelapse movie of MDCK cells, imaged at 20x magnification, is shown at left (top and  
556 bottom). The top row displays E-cadherin junctions, while the bottom row displays nuclei.  
557 Moving left from right, the second-from-left images are ground truth (actual) fluorescent images  
558 of the junctions/nuclei in green, followed by the FRM predictions in red, and finally the merge of  
559 the ground truth and predicted images. Predictions are produced by processing the DIC input on  
560 the left through a neural network trained on a dataset of matched DIC and fluorescence image  
561 pairs. Panel width is approximately 500  $\mu\text{m}$ , and time between frames is 20 minutes.

562 **Movies S3-5. FRM for fine structures.**

563 A DIC timelapse movie of HUVEC cells, imaged at 20x magnification, is shown at left. Movie S3  
564 shows VE-cadherin, Movie S4 shows Nuclei, and Movie S5 shows F-actin. All movies present  
565 DIC/Ground Truth/Prediction/Merge from left to right. Individual panel width is 890  $\mu\text{m}$ , with 20  
566 minutes per movie frame.

567 **Movie S6. Mitotic division prediction.**

568 A neural network is able to capture rare events, such as cell divisions, when trained on a  
569 sufficiently large and varied dataset. Left panel: a fluorescent timelapse of stained HUVEC  
570 nuclei, imaged at 20x magnification. Center panel: the U-Net predictions from DIC images of the  
571 same spatial region. Right panel: an overlay of the left and center panels for comparison. Time  
572 between frames is 20 minutes.

573  
574

## References.

1. Caicedo, J. C. *et al.* Data-analysis strategies for image-based cell profiling. *Nat. Methods* **14**, 849–863 (2017).
2. Moen, E. *et al.* Deep learning for cellular image analysis. *Nature Methods* **16**, 1233–1246 (2019).
3. Angermueller, C., Pärnamaa, T., Parts, L. & Stegle, O. Deep learning for computational biology. *Mol. Syst. Biol.* **12**, 878 (2016).
4. Litjens, G. *et al.* A survey on deep learning in medical image analysis. *Medical Image Analysis* **42**, 60–88 (2017).
5. Smith, K. *et al.* Phenotypic Image Analysis Software Tools for Exploring and Understanding Big Image Data from Cell-Based Assays. *Cell Systems* **6**, 636–653 (2018).
6. Belthangady, C. & Royer, L. A. Applications, promises, and pitfalls of deep learning for fluorescence image reconstruction. *Nat. Methods* **16**, 1215–1225 (2019).
7. Brent, R. & Boucheron, L. Deep learning to predict microscope images. *Nat. Methods* **15**, 868–870 (2018).
8. Weigert, M. *et al.* Content-aware image restoration: pushing the limits of fluorescence microscopy. *Nat. Methods* **15**, 1090–1097 (2018).
9. Christiansen, E. M. *et al.* In Silico Labeling: Predicting Fluorescent Labels in Unlabeled Images. *Cell* **173**, 792-803.e19 (2018).
10. Ounkomol, C., Seshamani, S., Maleckar, M. M., Collman, F. & Johnson, G. R. Label-free prediction of three-dimensional fluorescence images from transmitted-light microscopy. *Nat. Methods* **15**, 917–920 (2018).
11. LeCun, Y., Bottou, L., Bengio, Y. & Haffner, P. Gradient-based learning applied to document recognition. *Proc. IEEE* **86**, 2278–2323 (1998).
12. Krizhevsky, A., Sutskever, I. & Hinton, G. E. *ImageNet Classification with Deep Convolutional Neural Networks.* (2012).
13. Ronneberger, O., Fischer, P. & Brox, T. U-net: Convolutional networks for biomedical image segmentation. in *Lecture Notes in Computer Science (including subseries Lecture Notes in Artificial Intelligence and Lecture Notes in Bioinformatics)* **9351**, 234–241 (Springer Verlag, 2015).
14. Van Valen, D. A. *et al.* Deep Learning Automates the Quantitative Analysis of Individual Cells in Live-Cell Imaging Experiments. *PLoS Comput. Biol.* **12**, (2016).

15. Falk, T. *et al.* U-Net: deep learning for cell counting, detection, and morphometry. *Nat. Methods* **16**, 67–70 (2019).
16. Gupta, A. *et al.* Deep Learning in Image Cytometry: A Review. *Cytometry Part A* **95**, 366–380 (2019).
17. Caicedo, J. C. *et al.* Evaluation of Deep Learning Strategies for Nucleus Segmentation in Fluorescence Images. *Cytom. Part A* **95**, 952–965 (2019).
18. Newby, J. M., Schaefer, A. M., Lee, P. T., Forest, M. G. & Lai, S. K. Convolutional neural networks automate detection for tracking of submicron-scale particles in 2D and 3D. *Proc. Natl. Acad. Sci. U. S. A.* **115**, 9026–9031 (2018).
19. Kim, D., Min, Y., Oh, J. M. & Cho, Y. K. AI-powered transmitted light microscopy for functional analysis of live cells. *Sci. Rep.* **9**, (2019).
20. Goodfellow, I. J. *et al.* Generative adversarial nets. in *Advances in Neural Information Processing Systems* **3**, 2672–2680 (2014).
21. Rivenson, Y. *et al.* PhaseStain: the digital staining of label-free quantitative phase microscopy images using deep learning. *Light Sci. Appl.* **8**, (2019).
22. Rivenson, Y. *et al.* Virtual histological staining of unlabelled tissue-autofluorescence images via deep learning. *Nat. Biomed. Eng.* **3**, 466–477 (2019).
23. De Haan, K., Rivenson, Y., Wu, Y. & Ozcan, A. Deep-Learning-Based Image Reconstruction and Enhancement in Optical Microscopy. *Proc. IEEE* **108**, 30–50 (2020).
24. Erba, E., Ubezio, P., Broggin, M., Ponti, M. & D’Incalci, M. DNA damage, cytotoxic effect and cell-cycle perturbation of Hoechst 33342 on L1210 cells in vitro. *Cytometry* **9**, 1–6 (1988).
25. Durand, R. E. & Olive, P. L. Cytotoxicity, mutagenicity and DNA damage by Hoechst 33342. *J. Histochem. Cytochem.* **30**, 111–116 (1982).
26. Wlodkowic, D. & Darzynkiewicz, Z. Please do not disturb: Destruction of chromatin structure by supravital nucleic acid probes revealed by a novel assay of DNA-histone interaction. *Cytom. Part A* **73**, 877–879 (2008).
27. Bray, M. A. *et al.* Cell Painting, a high-content image-based assay for morphological profiling using multiplexed fluorescent dyes. *Nat. Protoc.* **11**, 1757–1774 (2016).
28. Garcia, M. A., Nelson, W. J. & Chavez, N. Cell–cell junctions organize structural and signaling networks. *Cold Spring Harb. Perspect. Biol.* **10**, (2018).
29. Friedl, P. & Mayor, R. Tuning collective cell migration by cell-cell junction regulation. *Cold Spring Harb. Perspect. Biol.* **9**, 1–18 (2017).
30. Hayer, A. *et al.* Engulfed cadherin fingers are polarized junctional structures between collectively migrating endothelial cells. *Nat. Cell Biol.* **18**, 1311–1323 (2016).
31. He, K., Zhang, X., Ren, S. & Sun, J. *Deep Residual Learning for Image Recognition*.

- (2016).
32. Newell, A., Yang, K. & Deng, J. Stacked hourglass networks for human pose estimation. in *Lecture Notes in Computer Science (including subseries Lecture Notes in Artificial Intelligence and Lecture Notes in Bioinformatics)* **9912 LNCS**, 483–499 (2016).
  33. Szegedy, C. *et al.* Going deeper with convolutions. *Proceedings of the IEEE Computer Society Conference on Computer Vision and Pattern Recognition* **07-12-June**, (2015).
  34. Xing, F. & Yang, L. Robust nucleus/cell detection and segmentation in digital pathology and microscopy images: A comprehensive review. *IEEE Reviews in Biomedical Engineering* **9**, 234–263 (2016).
  35. Nowak, J. A. & Fuchs, E. Isolation and culture of epithelial stem cells. *Methods Mol. Biol.* **482**, 215–232 (2009).
  36. Cohen, D. J., Gloerich, M. & Nelson, W. J. Epithelial self-healing is recapitulated by a 3D biomimetic E-cadherin junction. (2016). doi:10.1073/pnas.1612208113
  37. Weinman, J. J., Lidaka, A. & Aggarwal, S. TensorFlow: Large-scale machine learning. *GPU Comput. Gems Emerald Ed.* 277–291 (2011). doi:1603.04467
  38. Zeiler, M. D. ADADELTA: An Adaptive Learning Rate Method. (2012).
  39. Dunn, K. W., Kamocka, M. M. & McDonald, J. H. A practical guide to evaluating colocalization in biological microscopy. *American Journal of Physiology - Cell Physiology* **300**, (2011).
